# Supplementary material for: EZH2 alteration driven by microRNA-524-5p and microRNA-324-5p promotes cell proliferation and temozolomide resistance in glioma
Source: PubMed Central journal article supplement (PMC5707096; doi:10.18632/oncotarget.21996), 2017-10-24
Supplement: oncotarget-08-96239-s001.pdf [file oncotarget-08-96239-s001.pdf]

## EZH2 alteration driven by microRNA-524-5p and microRNA-324-5p promotes cell proliferation and temozolomide resistance in glioma

### SUPPLEMENTARY MATERIALS

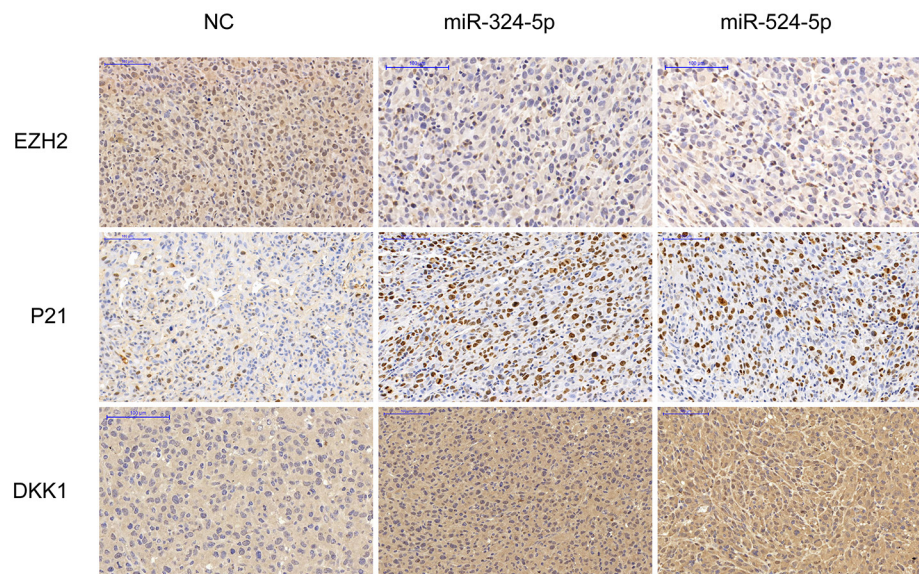

Supplementary Figure 1: Representative IHC images of EZH2, P21 and DKK1 in tissues from mice with orthotopic tumors derived from LV-miR-NC-U87, LV-miR-324-5p-U87 and LV-miR-524-5p-U87 cells. Magnification  $\times 200$ .

Supplementary Table 1: Clinical and molecular pathology features of GBM samples in association with miR-524-5p expression

|                                                      | Low               | High              | P value |
|------------------------------------------------------|-------------------|-------------------|---------|
| No. of cases                                         | 32                | 32                |         |
| Gender (Female/ Male)                                | 11/21             | 11/21             | 1       |
| Age at diagnosis (Year)                              | 44.6 $\pm$ 13.3   | 42.8 $\pm$ 12.8   | 0.250   |
| KPS score ( $\geq 80$ / $< 80$ )                     | 20/12             | 23/9              | 0.424   |
| MGMT promoter methylation (Unmethylated/ Methylated) | 16/7              | 10/6              | 0.645   |
| IDH1 mutation (Mutation/ No mutation)                | 2/29              | 8/15              | 0.012   |
| Ki-67(Low/ High)                                     | 9/21              | 11/21             | 0.713   |
| EGFR (Low/ High)                                     | 13/17             | 16/16             | 0.599   |
| MGMT (Low/ High)                                     | 13/17             | 8/24              | 0.127   |
| MMP9 (Low/ High)                                     | 6/24              | 7/25              | 0.856   |
| P53 (Low/ High)                                      | 9/21              | 5/27              | 0.176   |
| PCNA (Low/ High)                                     | 15/15             | 24/8              | 0.042   |
| Overall Survival                                     | 390.9 $\pm$ 202.7 | 509.2 $\pm$ 197.0 | 0.021   |
